# Supplementary material for: Manipulation of magneto-electroluminescence from exciplex-based spintronic organic light-emitting diodes
Source: Royal Society of Chemistry journal article supplement (doi:10.1039/d3tc01885g), 2023-01-01
Supplement: d3tc01885g1.pdf [file d3tc01885g1.pdf]

## Supporting Information

### Manipulation of Magneto-Electroluminescence from Exciplex-Based Spintronic Organic Light-Emitting Diodes

Chenghao Liu, Zhen Chen, Huitian Du, Yuan Yu, Junfeng Ren, Jihui Fan, Shenghao Han\*, and Zhiyong Pang\*

Chenghao Liu, Zhen Chen, Huitian Du, Yuan Yu, Jihui Fan, Zhiyong Pang, Shenghao Han

School of Microelectronics, Shandong University, Jinan 250100, P. R. China;

E-mail: [pang@sdu.edu.cn](mailto:pang@sdu.edu.cn); [hansh@sdu.edu.cn](mailto:hansh@sdu.edu.cn)

Junfeng Ren

School of Physics and Electronics, Shandong Normal University, Jinan 250358, P.R. China;

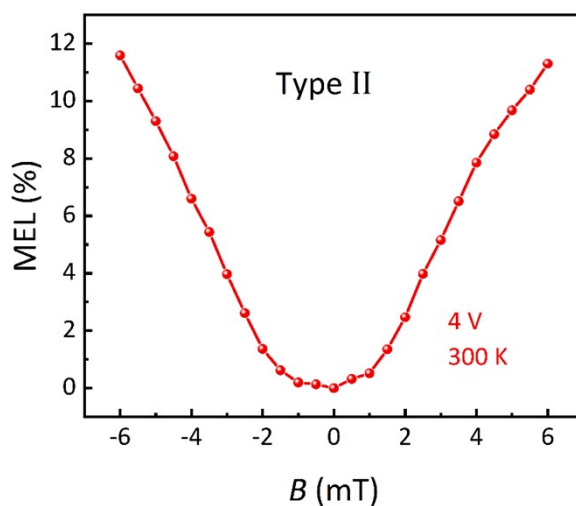

Fig. S1 MEL( $B$ ) response for Type II device under small magnetic-field scales.

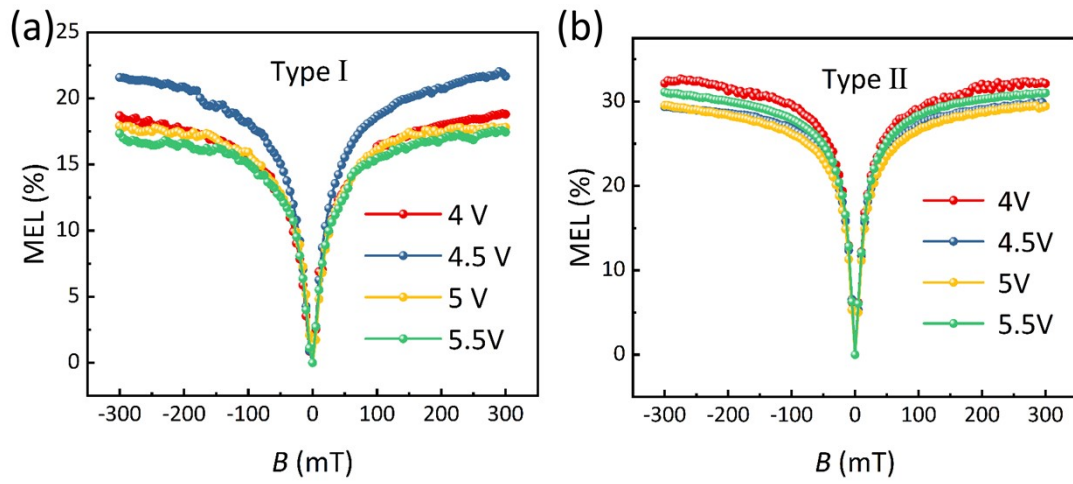

**Fig. S2** MEL( $B$ ) responses for Type I (a) and Type II (b) devices at various voltages at 300 K, respectively.

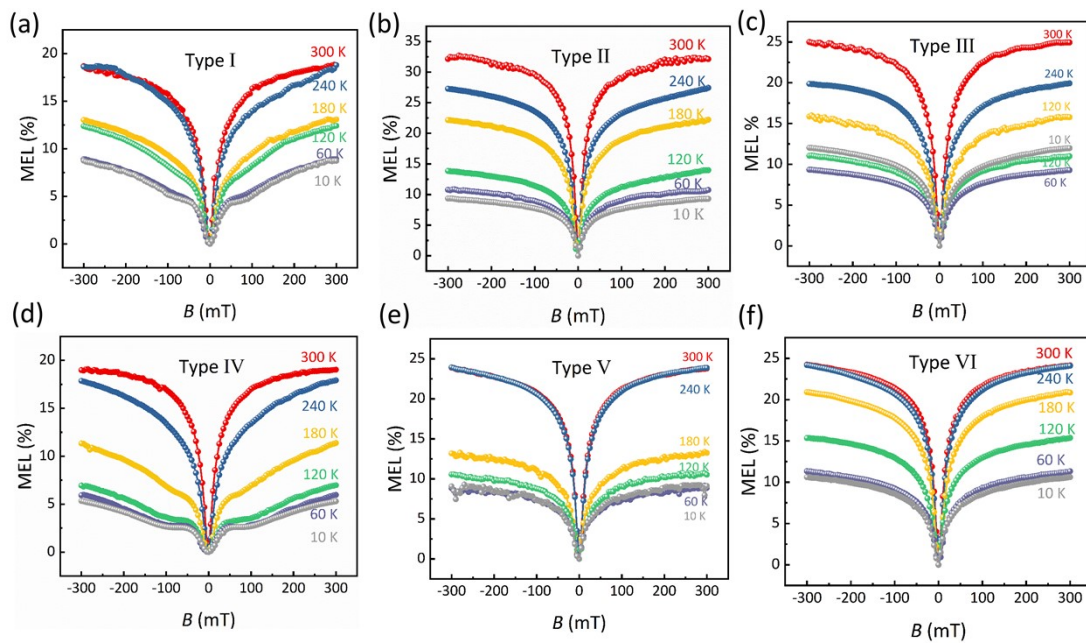

**Fig. S3** MEL( $B$ ) responses for Type I-VI devices at various temperatures.

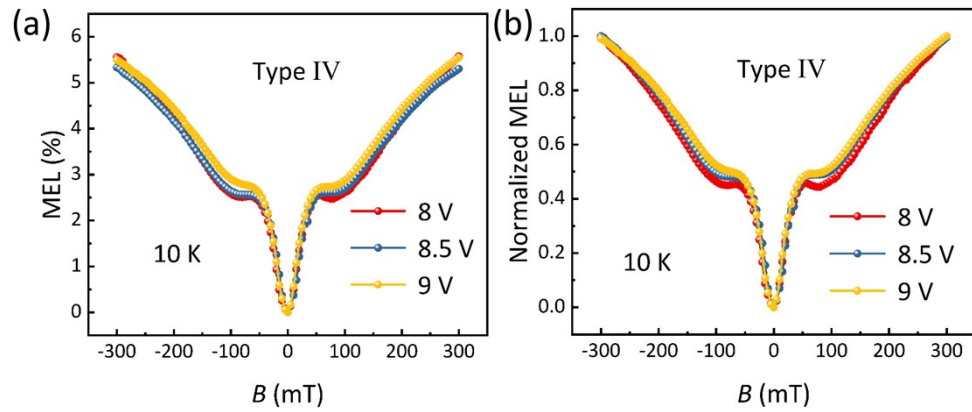

**Fig. S4** Voltage-dependent unnormalized (a) and normalized (b) MEL( $B$ ) responses for Type IV device at 10 K. The MEL and FWHM values change a little as the voltage increases from 8 to 9 V.

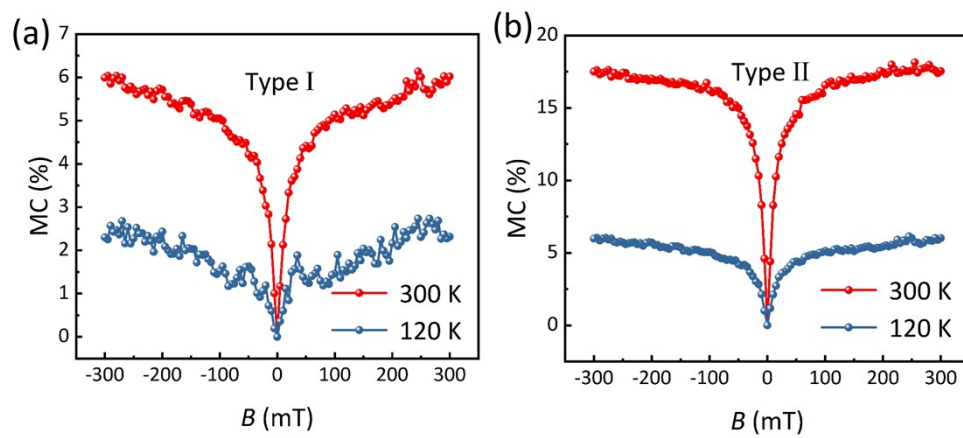

**Fig. S5** MC( $B$ ) responses for Type I (a) and Type II (b) devices at 300 K and 120 K, respectively.

**Table R1.** Summary of the MEL(*B*) responses and EL performance for Type I-VI device.

| Device # | MEL <sup>a)</sup><br>(%) | MEL <sup>b)</sup><br>(%) | FWHM <sup>a)</sup><br>(mT) | FWHM <sup>b)</sup><br>(mT) | Brightness <sup>c)</sup><br>(cd/cm <sup>2</sup> ) | Current density <sup>c)</sup><br>(mA/cm <sup>2</sup> ) |
|----------|--------------------------|--------------------------|----------------------------|----------------------------|---------------------------------------------------|--------------------------------------------------------|
| Type I   | 18.8                     | 8.7                      | 48.9                       | 122.7                      | 137.9                                             | 99.66                                                  |
| Type II  | 32.4                     | 12.1                     | 29.1                       | 42.3                       | 152.7                                             | 71.34                                                  |
| Type III | 24.9                     | 12.0                     | 36.4                       | 50.7                       | 151.5                                             | 111.8                                                  |
| Type IV  | 19.6                     | 5.3                      | 40.6                       | 236.2                      | 123.4                                             | 97.11                                                  |
| Type V   | 23.9                     | 9.1                      | 37.4                       | 57.2                       | 158                                               | 71.93                                                  |
| Type VI  | 24.2                     | 10.6                     | 34.4                       | 54.5                       | 154                                               | 119                                                    |

<sup>a)</sup> At 300 K. <sup>b)</sup> At 10 K. <sup>c)</sup> The maximum brightness and corresponding current density.
